# Supplementary material for: Although c-MYC contributes to tamoxifen resistance, it improves cisplatin sensitivity in ER-positive breast cancer
Source: PubMed Central journal article supplement — Int J Oncol. 2020 Feb 14;56(4):932–44. doi: 10.3892/ijo.2020.4987 (PMC7050981; doi:10.3892/ijo.2020.4987), 2020-02-14
Supplement: Supplementary_Data.pdf [file Supplementary_Data.pdf]

Figure S1. (A) Invasive capacities and (B) bar charts of T47D and T47DR cells evaluated using Transwell invasion assays. Magnification, x100, x200 and x400. (C) Western blot analysis and (D) densitometric analysis of E-cadherin and vimentin in T47D and T47DR cells. Data are presented as the means  $\pm$  standard deviation of the mean of 3 repeats. **\*\***P<0.01.

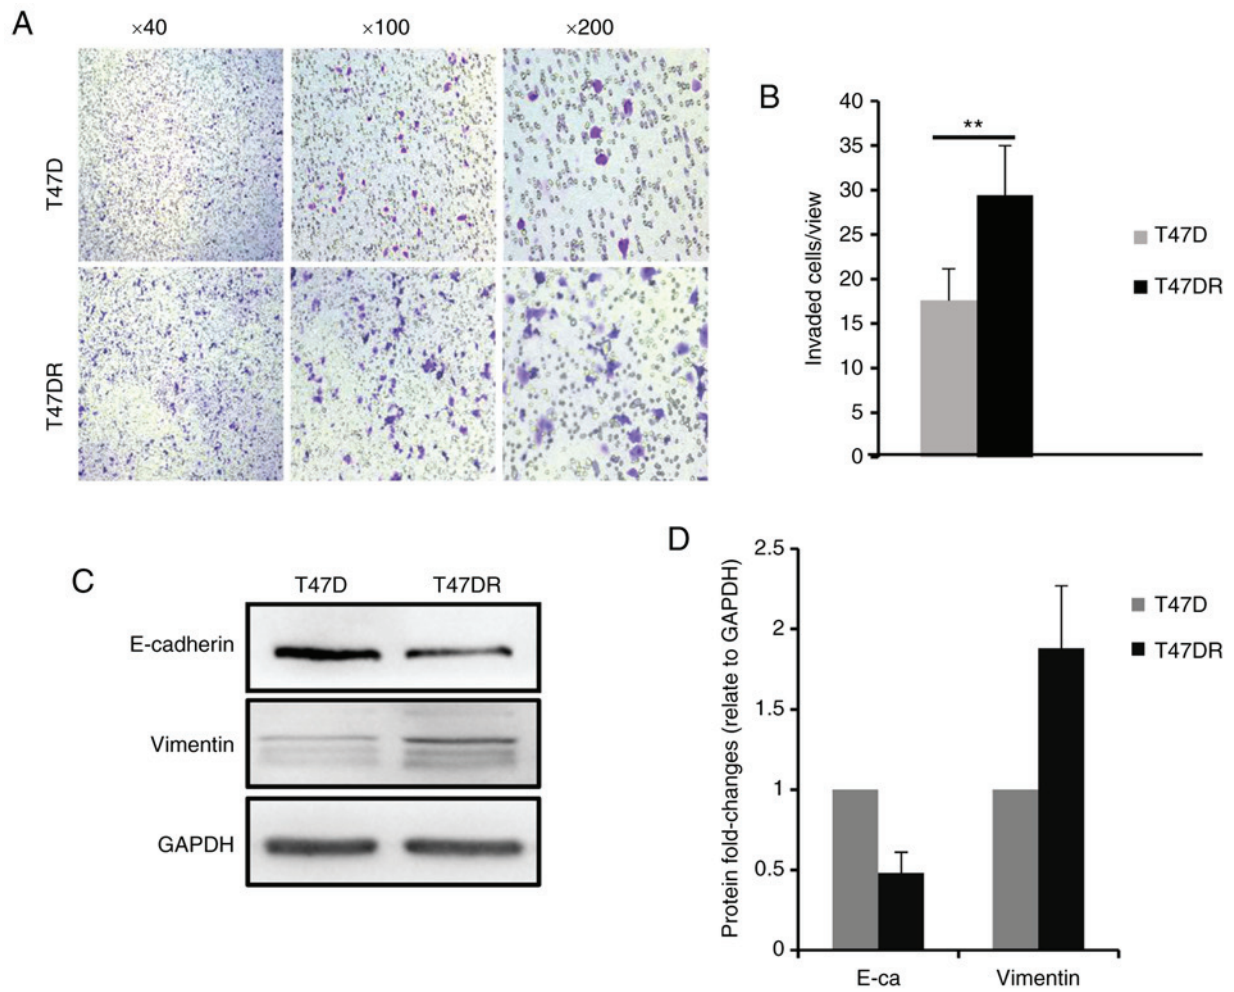

Figure S2. Differential expression of c-MYC was identified in (A) breast cancer tissue (red bar), para-cancer tissue (gray bar) and (B) in different molecular subtypes of breast cancer using data from The Cancer Genome Atlas. \* $P < 0.01$ . (C) Higher levels of c-MYC were associated with poor distant metastasis free survival of patients with breast cancer. The expression levels of c-MYC predicted post-progression survival in patients with (D) ER<sup>+</sup> but not (E) ER<sup>-</sup> breast cancer; ER<sup>+</sup>, estrogen receptor-positive; ER<sup>-</sup>, estrogen receptor-negative.

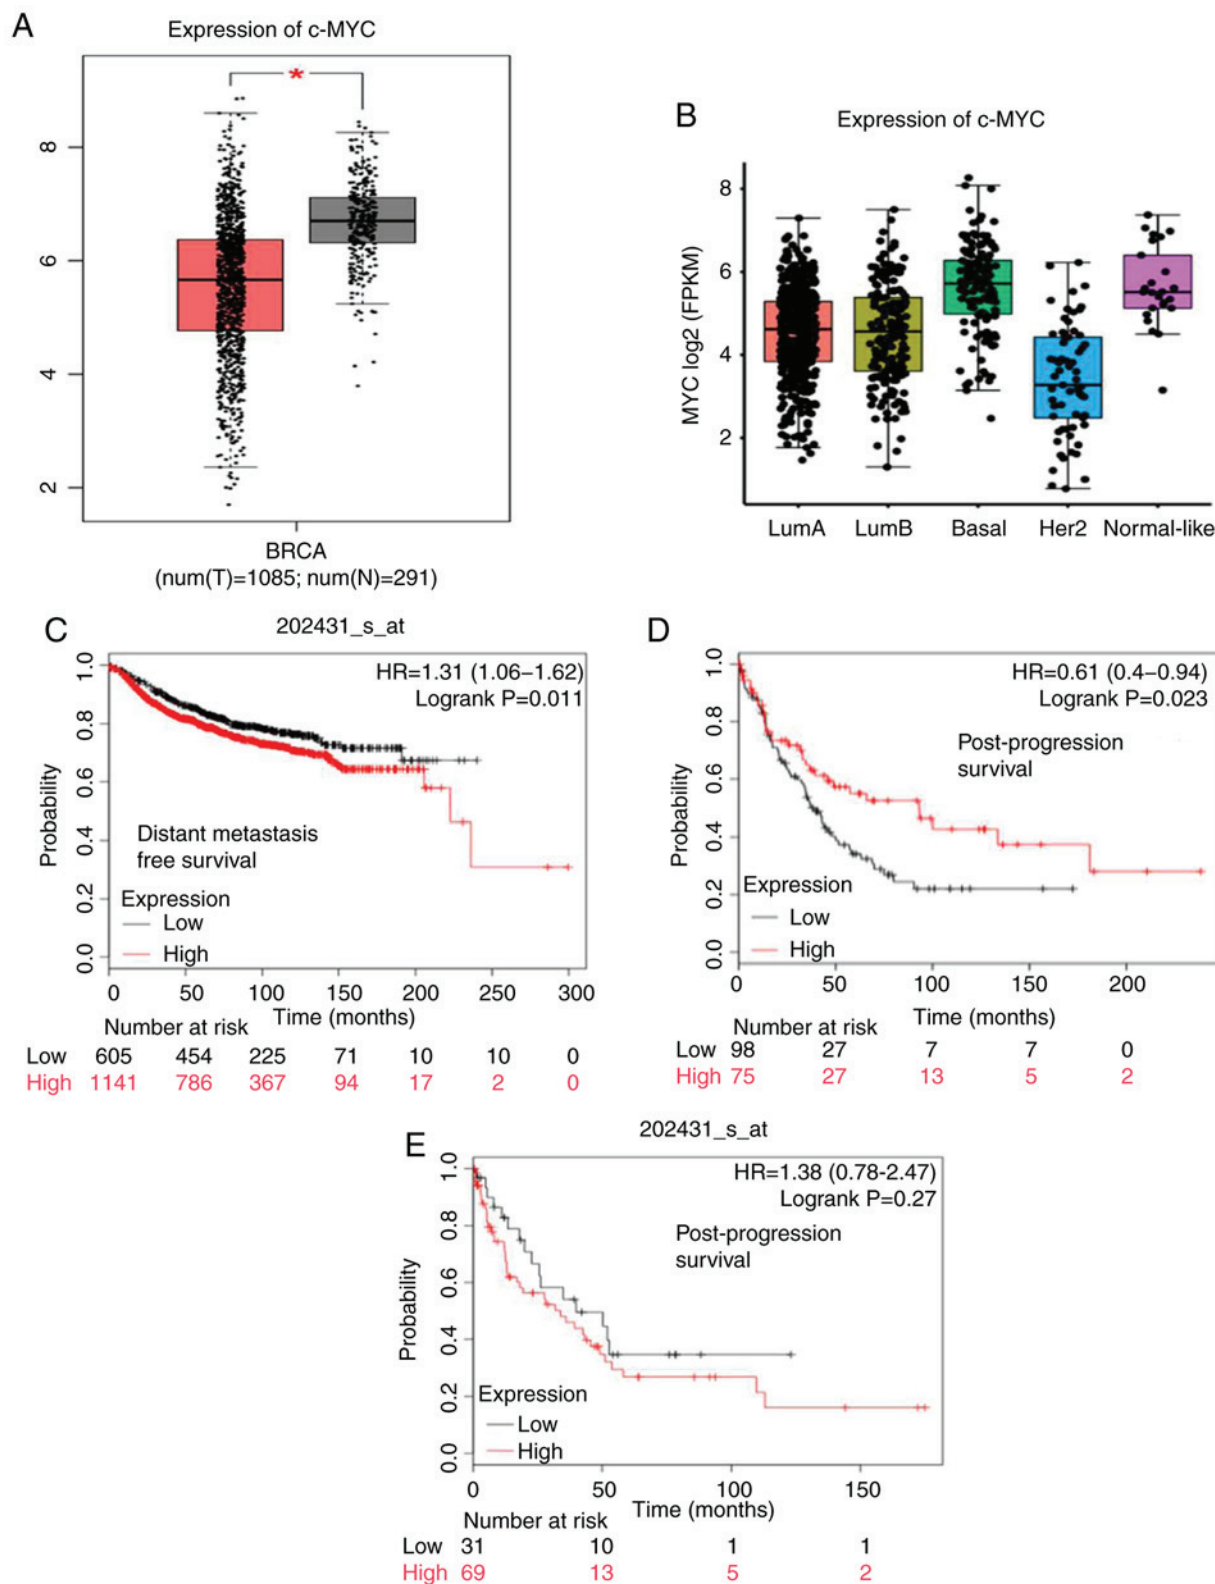

Table SI. Sequences of primers used for RT-qPCR analysis.

| Gene name | Forward 5'-3'          | Reverse 5'-3'          |
|-----------|------------------------|------------------------|
| GAPDH     | TTCTTTTGCCTCGCCAGCCGA  | GTGACCAGGCGCCCAATACGA  |
| c-MYC     | AAAGGCCCCCAAGGTAGTTA   | GCACAAGAGTTCCGTAGCTG   |
| MRP       | ACTTCCTCTATCTCTCCCGACA | AAGACTGAACTCCCTTCCTCCT |
| MDR       | ATTTGACACCCTGGTTGGAG   | ACCACTGCTTCGCTTTCTGT   |
| BCPR      | CTCAGTTTATCCGTGGTGTGT  | GATTGTTCGTCCCTGCTTAGAC |

Table SII. The sequences of siRNAs used against c-MYC mRNA.

| Gene name | Forward 5'-3'         |                       |
|-----------|-----------------------|-----------------------|
| NC        | UUCUCCGAACGUGUCACGUTT | ACGUGACACGUUCGGAGAATT |
| siRNA-1   | GCCACAGCAUACAUCUGUTT  | ACAGGAUGUAUGCUGUGGCTT |
| siRNA-2   | UCCUGAGACAGAUCAGCAATT | UUGCUGAUCUGUCUCAGGATT |

Table SIII. Clinical characteristics of primary and recurrent/metastatic specimens in 28 pairs of patients after tamoxifen treatment.

| Patient no. | Age (years) | Stage  | TTR <sup>a</sup> (months) | Recurrent or metastatic site |
|-------------|-------------|--------|---------------------------|------------------------------|
| 1           | 36          | T2N1M0 | 14                        | Chest wall                   |
| 2           | 48          | T2N1M0 | 14                        | Lung                         |
| 3           | 35          | T2N1M0 | 72                        | Chest wall                   |
| 4           | 45          | T2N1M0 | 48                        | Chest wall                   |
| 5           | 40          | T2N2M0 | 36                        | Lymph node                   |
| 6           | 41          | T1N0M0 | 24                        | Chest wall                   |
| 7           | 26          | T2N0M0 | 24                        | Chest wall                   |
| 8           | 37          | T2N1M0 | 60                        | Breast                       |
| 9           | 34          | T3N0M0 | 84                        | Lymph node                   |
| 10          | 44          | T2N2M0 | 84                        | Bone                         |
| 11          | 29          | T2N1M0 | 48                        | Cardiac vesicle              |
| 12          | 43          | T2N0M0 | 72                        | Lymph node                   |
| 13          | 46          | T3N0M0 | 48                        | Lymph node                   |
| 14          | 48          | T3N2M0 | 12                        | Chest wall                   |
| 15          | 45          | T2N1M0 | 48                        | Breast                       |
| 16          | 47          | T1N1M0 | 36                        | Lymph node                   |
| 17          | 35          | T1N0M0 | 48                        | Lymph node                   |
| 18          | 42          | T2N0M0 | 36                        | Breast                       |
| 19          | 50          | T1N0M0 | 12                        | Chest wall                   |
| 20          | 52          | T3N2M0 | 7                         | Chest wall                   |
| 21          | 37          | T2N0M0 | 24                        | Breast                       |
| 22          | 37          | T2N0M0 | 30                        | Lymph node                   |
| 23          | 49          | T2N1M0 | 72                        | Chest wall                   |
| 24          | 34          | T1N0M0 | 36                        | Breast                       |
| 25          | 60          | T2N2M0 | 30                        | Lymph node                   |
| 26          | 45          | T1N0M0 | 24                        | Breast                       |
| 27          | 51          | T1N1M0 | 48                        | Chest wall                   |
| 28          | 36          | T3N1M0 | 72                        | Lymph node                   |

<sup>a</sup>Time to relapse/metastasis: Time since the diagnosis of breast cancer until the diagnosis of metastatic relapse.
